# Supplementary material for: New DNA Methylation Markers for Pancreatic Cancer: Discovery, Tissue Validation, and Pilot Testing in Pancreatic Juice
Source: Oxford University Press journal article supplement (doi:10.1158/1078-0432.ccr-14-2469), 2015-05-28
Supplement: 10780432ccr142469-sup-138391_2_supp_2942145_nmx27m.xlsx [file 10780432ccr142469-sup-138391_2_supp_2942145_nmx27m.xlsx]

## Sheet: Supplemental Table XX  AUC and 
	ROC AUC	Std. Error	z value	Pr(>z)	lower.95	upper.95
PRKCB MF1	1	0	Inf	0	1	1
GRIN2D F	0.99	0.012	42	0	0.97	1
CLEC11A	0.98	0.02	24	0	0.94	1
IFIH1	0.97	0.02	23	0	0.93	1
KCNK12	0.97	0.02	23	0	0.93	1
WT1	0.97	0.018	26	0	0.94	1
CACNA1	0.96	0.025	18	0	0.91	1
CD1D	0.95	0.03	15	0	0.89	1
KCNN2	0.95	0.021	21	0	0.91	1
TWIST1	0.95	0.025	18	0	0.9	1
SLC38A	0.94	0.024	18	0	0.9	0.99
ADCY1	0.94	0.03	14	0	0.88	1
RSPO3	0.94	0.027	16	0	0.89	0.99
USP3	0.94	0.029	15	0	0.89	1
IKZF1 R	0.94	0.049	9.1	0	0.85	1
ABCB1	0.93	0.033	13	0	0.87	1
NDRG4	0.93	0.031	14	0	0.87	0.99
C13ORF18	0.92	0.035	12	0	0.85	0.99
ELMO	0.92	0.031	14	0	0.86	0.99
EOMES	0.92	0.032	13	0	0.86	0.99
SCARF2	0.92	0.035	12	0	0.85	0.98
VWC2	0.92	0.033	13	0	0.86	0.99
PRKCB	0.91	0.034	12	0	0.84	0.97
BMP2	0.9	0.037	11	0	0.83	0.97
FOXP2 F	0.9	0.075	5.4	0	0.75	1
IFGF2BP1	0.89	0.038	10	0	0.81	0.96
HECW1	0.87	0.042	8.8	0	0.79	0.95
LOC63930 (BHLHE23)	0.87	0.041	9.1	0	0.79	0.95
RRNF216	0.87	0.041	9.1	0	0.79	0.95
SHH F	0.87	0.093	4	0	0.69	1
CELF2	0.86	0.045	8	0	0.77	0.95
AK055957	0.86	0.048	7.3	0	0.76	0.95
PRKCB MF2	0.86	0.086	4.2	0	0.69	1
NDUFAB1	0.85	0.047	7.3	0	0.75	0.94
NFASC	0.85	0.049	7	0	0.75	0.94
TMEM200A	0.85	0.049	7	0	0.75	0.94
TOX2	0.85	0.048	7.3	0	0.76	0.94
CRHR2	0.85	0.047	7.4	0	0.76	0.94
